# Supplementary material
Source: PubMed Central journal article supplement (PMC522785)

A

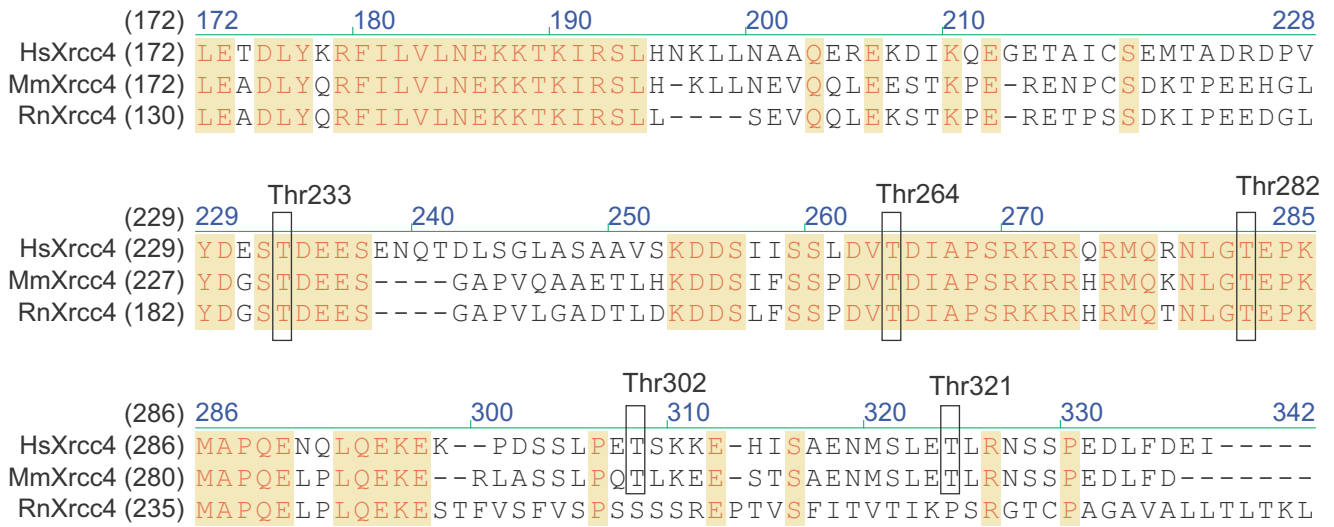

B

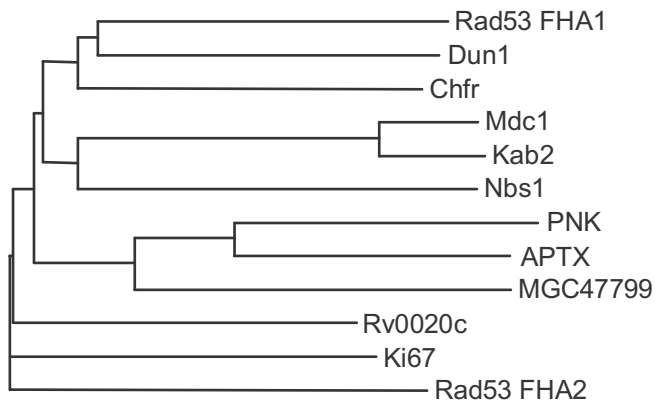

**A**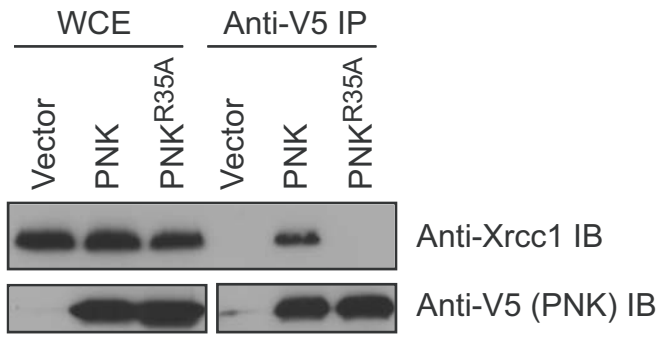**B**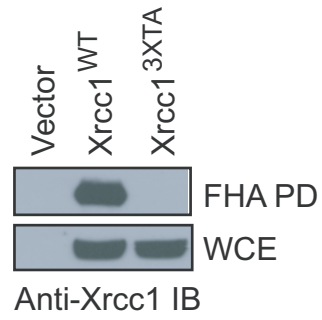**C**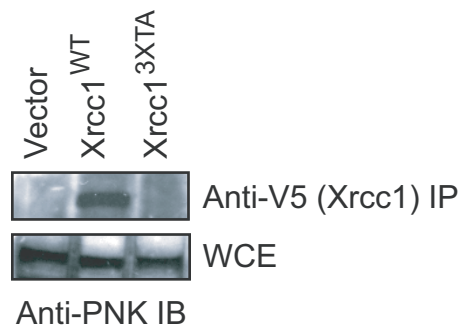

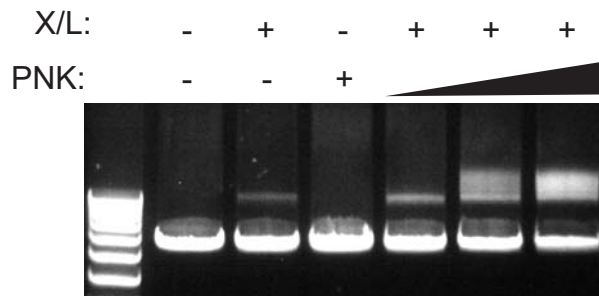

Substrate: 5'-phosphate ends

Koch et al. Supplementary Figure 3

**A**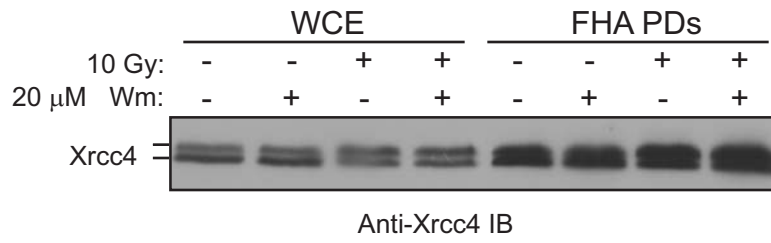**B**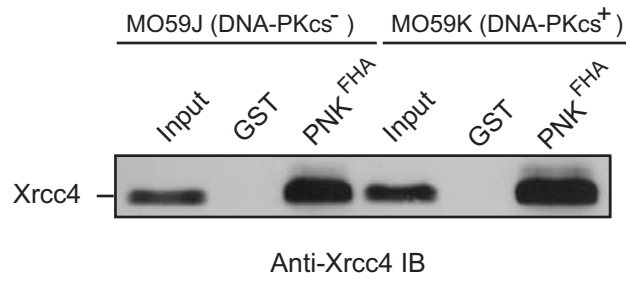

Supplement: 7600375s2.pdf [file 7600375s2.pdf]
